# Supplementary material
Source: publisher site journal article supplement (https://www.dovepress.com/article/543359)
Supplement: Supplementary file 1 [file 543359%20Revised%20Supplementary%20Figure.jpg]

**Supplemental data**

**Tables.**

**Table S1.** Means (SD) and mean differences (95%-CI).

| **Light function** | **Location on the face** | **Hair parameter** | **Mean (SD) in men** | **Mean (SD) in women** | **Difference between the means (95%-CI)** |
| --- | --- | --- | --- | --- | --- |
| **Visible light** | Upper lip | Number of terminal hairs | 27 (15) | 0 (1) | 27 (19-34) |
| Hair thickness | 97.4 (14.7) | 66.0 (6.2) | 31.4 (19.1-43.6) |
| Chin | Number of terminal hairs | 29 (18) | 0 (0) | 28 (19-39) |
| Hair thickness | 97.5 (13.6) | . | 97.5 (90.0-105.0) |
| **Ultraviolet light** | Upper lip | Number of terminal hairs | 21 (5) | 0 (0) | 21 (13-29) |
| Hair thickness | 101.7 (13.9) | . | 101.7 (93.7-109.7) |
| Chin | Number of terminal hairs | 24 (17) | 0 (0) | 24 (15-34) |
| Hair thickness | 108.0 (14.9) | . | 108.0 (99.4-166.6) |

**Table S2.** Intraclass correlation coefficients (ICCs).

|  | **Obtaining the photos with the digital microscope camera, one-way random intraclass correlation coefficients** | | | | | | **Analyzing the output with the assisting software, two-way mixed intraclass correlation coefficients** | | | | | |
| --- | --- | --- | --- | --- | --- | --- | --- | --- | --- | --- | --- | --- |
| **Number of terminal hairs** | | | **Hair thickness** | | | **Number of terminal hairs** | | | **Hair thickness** | | |
| **Light function** | ICC | 95% CI | P | ICC | 95% CI | P | ICC | 95% CI | P | ICC | 95% CI | P |
| **Visible**  **light** | 0.988 | 0.976-0.994 | * | 0.919 | 0.765-0.972 | * | 0.998 | 0.995-0.999 | * | 0.938 | 0.828-0.977 | * |
| **UV light** | 0.897 | 0.786-0.951 | * | 0.835 | 0.502-0.946 | * | 0.961 | 0.918-0.981 | * | 0.248 | -1.342-0.759 | 0.307 |

*P<.001

**Figures.**

**
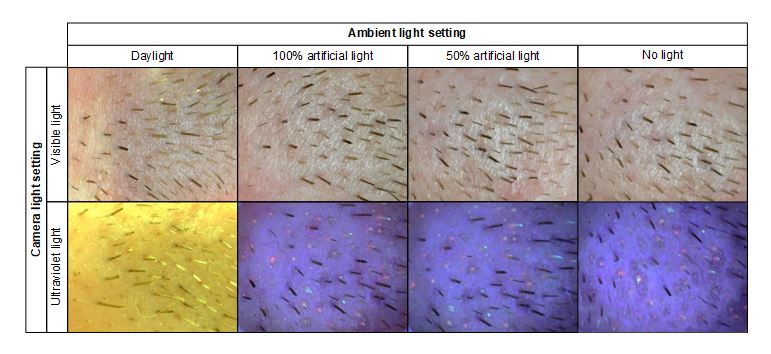
Figure S1.** The influence of variable ambient light conditions on visible light and UV fluorescence light photos.
